# Supplementary material for: Genetic variations in the drug metabolizing enzyme, CYP2E1, among various ethnic populations of Pakistan
Source: PeerJ. 2020 Aug 19;8:e9721. doi: 10.7717/peerj.9721 (PMC7443092; doi:10.7717/peerj.9721)
Supplement: Supplemental Information 3 — Shows all subjects examined according to their gender, ethnicity, age, genotype, addiction (eg. smoking), diet (red meat consumption), sedentary life, family history, medication, co-morbidities, and diseases. [file peerj-08-9721-s003.xlsx]

## Sheet: Sheet1
Gender	Age(yrs)	Genotype	Genotype	Smoking Status	Red Meat Consumption	Sedentary lifestyle	Disease	Family History of the Disease	BMI
male	36	AG	Seraiki	Yes	monthly	yes	fatty liver	No	26.3
male	30	AA	Urdu Speaking	No	monthly	No	No	No	20.8
male	31	AA	chitrali	Yes	weekly	No	No	No	22.8
male	29	AA	Punjabi	Yes	yearly	No	No	No	18.5
female	30	AA	Pathan	No	weekly	No	No	No	23.8
male	38	AA	Punjabi	Yes	weekly	No	No	No	25.6
male	64	AA	Pathan	Yes	weekly	No	No	hypertension	27.9
male	24	AA	Punjabi	No	No	No	No	No	21.2
female	23	AA	Pathan	No	weekly	No	No	No	24.9
female	23	AA	Punjabi	No	weekly	No	No	No	28.5
male	24	AA	Pathan	No	weekly	No	No	hypertension	24.2
male	22	AA	Kashmiri	No	monthly	No	high cholesterol	hypertension/diabetes	20
Male	21	AA	Punjabi	No	Weekly	No	No	No	18
Male	19	AG	Punjabi	No	Weekly	No	No	No	23.5
Male	17	AG	Punjabi	No	Weekly	yes	No	No	24.2
Male	15	AA	Punjabi	No	Weekly	No	No	No	20.6
Female	13	AA	Punjabi	No	Yearly	No	HTN	No	25.3
Male	11	AA	Pathan	Yes	Weekly	No	No	No	21.9
Male	22	AA	Punjabi	Yes	Weekly	No	No	No	17.2
Male	23	AA	Punjabi	Yes	Weekly	No	esophagitis	No	17.6
Male	20	AA	Punjabi	No	Monthly	No	No	No	16.9
Female	22	GG	Punjabi	Yes	Monthly	No	Pancreatitis, GERD	No	17
Male	23	AG	Punjabi	Yes	Monthly	No	TB (-ve)	No	28.4
Male	23	AA	Punjabi	Yes	Weekly	No	No	No	23.5
Male	23	AA	Punjabi	Yes	Weekly	No	Nephrolithiasis	No	28.2
Male	18	AA	Punjabi	Yes	Weekly	No	No	No	24.2
Male	18	AA	Punjabi	Yes	Monthly	No	No	No	20.7
Male	18	AA	Punjabi	Yes	Weekly	No	No	No	19.5
Male	30	AA	Punjabi	Yes	Weekly	No	No	No	20.7
Male	18	AA	Punjabi	No	Weekly	No	No	No	22.4
Male	22	GG	Punjabi	Yes	Daily	No	No	No	21.6
Male	21	AA	Punjabi	No	Weekly	yes	HTN	Yes	27.3
Male	23	AG	Punjabi	No	Weekly	No	No	No	32.8
Male	20	AG	Punjabi	Yes	Monthly	No	No	No	18.6
Male	32	AA	Punjabi	No	Weekly	No	No	No	23.7
Male	45	AG	Punjabi	No	Monthly	yes	Jaundice, Diabetes	No	23.4
Male	26	AA	Punjabi	No	Weekly	No	No	No	23.7
Male	36	AA	Punjabi	Yes	Weekly	yes	HTN, hyperlipidemia, CVT,Alzhimers	Yes	32.4
Male	19	AA	Punjabi	No	Weekly	yes	No	No	26
Male	19	AA	Punjabi	No	Weekly	No	No	No	27.8
Male	21	AA	Punjabi	Yes	Weekly	No	No	No	19.5
Male	20	AA	Punjabi	No	Weekly	No	No	No	16.9
Male	19	AA	Punjabi	No	Weekly	yes	No	No	20.7
Male	48	AA	Punjabi	Yes	Weekly	yes	No	No	26.9
Male	69	AA	Punjabi	Yes	Weekly	yes	bronchitis	No	22.7
Male	37	AA	Punjabi	No	Weekly	yes	No	No	29.7
Male	24	AA	Punjabi	No	Weekly	No	No	No	20.7
Male	22	AA	Punjabi	Yes	Weekly	yes	TB (-ve)	No	25.6
Male	58	AG	Punjabi	No	Daily	yes	diabetese mellitus	Yes	32.3
Male	62	AA	Punjabi	Yes	No	No	No	No	21.2
Male	22	AA	Punjabi	Yes	Weekly	yes	No	No	24.7
Female	21	AG	Urdu Speaking	No	Weekly	yes	ulcerative colitis	No	18.3
Male	23	AG	Punjabi	Yes	Daily	yes	No	No	28.5
Female	29	AA	Punjabi	No	weekly	No	No	No	20.3
Female	30	AA	Punjabi	No	weekly	No	No	No	23.05
Female	58	AA	Punjabi	No	weekly	No	No	No	23.8
Male	26	AA	Punjabi	No	weekly	No	No	No	27.9
Female	44	AA	Punjabi	No	weekly	yes	No	diabetes	25.8
Male	12	AA	Punjabi	No	weekly	No	No	diabetes	18
Female	47	AG	Punjabi	No	weekly	yes	diabetes	diabetes	33.3
Male	24	AA	Punjabi	No	weekly	No	No	diabetes	26.9
Female	41	AA	Punjabi	No	weekly	No	No	No	21.79
Female	10	GG	Punjabi	No	weekly	No	No	diabetes	22.3
Female	19	AA	Seraiki	No	daily	No	No	No	26.9
Female	21	AA	Punjabi	No	monthly	yes	No	No	18.3
Female	20	AA	Punjabi	No	weekly	yes	No	No	24.6
Female	23	AA	Punjabi	No		No	No	No	20.8
Female	31	AA	Punjabi	No	weekly	yes	No	No	23.8
Male	25	AA	Punjabi	No	weekly	yes	No	No	21.8
Male	33	AA	Seraiki	No	monthly	yes	No	No	26.2
Female	28	AA	Pathan	No	monthly	No	No	No	22
Male	28	AA	Punjabi	No	weekly	yes	No	No	20.7
Male	44	AA	Punjabi	yes	weekly	No	No	No	25.4
male	30	AA	Seraiki	No	yearly	yes	No	No	21.6
Male	28	AA	Pathan	No	weekly	No	No	No	22.8
Female	23	AA	Punjabi	No	monthly	No	No	No	24.6
Male	22	AA	Pathan	No	weekly	yes	No	No	20.4
Male	35	AA	Punjabi	No	weekly	yes	No	No	25.8
Male	25	AA	Pathan	No	weekly	yes	No	No	19
Male	35	GG	Urdu Speaking	yes	weekly	No	No	HTN	16
Female	33	AA	Kashmiri	No	weekly	No	No	HTN	21
Female	42	AA	Punjabi	No	monthly	No	No	No	23.5
Male	25	AA	Pathan	yes	weekly	No	No	No	18
Male	20	AA	Urdu Speaking	No	weekly	No	No	No	16
Male	27	AA	Punjabi	No	weekly	yes	No	No	27.7
Male	49	AA	Punjabi	No	weekly	yes	diabetes	No	23.1
Male	22	AA	Pathan	No	weekly	No	No	HTN	19.7
Male	23	AA	Pathan	No	weekly	No	No	No	21.8
Male	23	AA	Pathan	No	monthly	No	No	No	24.6
Male	23	AA	Pathan	No	weekly	No	No	No	21.6
Male	21	AA	Kashmiri	Yes	weekly	yes	No	No	25.4
Male	20	AA	Punjabi	No	monthly	yes	No	No	16.4
Male	53	AA	Punjabi	No	weekly	No	ulcer/htn	DM & Cardiac	23.1
Male	22	AA	Kashmiri	Yes	weekly	yes	Htn	DM	34.5
Male	22	AA	Punjabi	No	weekly	No	No	No	19.6
Male	23	AA	Punjabi	No	weekly	No	No	DM	24.9
Male	35	AA	Punjabi	No	monthly	No	No	Hep-B	26
Male	23	AA	Punjabi	No	weekly	No	No	DM HTN	34.2
Male	30	AA	Punjabi	No	weekly	No	Ulcer	Ulcer	20.3
Female	20	AA	Kashmiri	No	weekly	No	No	Heart Disease	20.4
Male	22	AA	Balochi	No	weekly	No	No	Cardiac	25.3
Male	23	AA	Seraiki	No	weekly	No	No	No	18.5
Male	22	AG	Punjabi	Yes	weekly	No	No	cardiac	26.8
Male	23	AA	Punjabi	Yes	weekly	yes	No	No	19.6
Female	40	AA	Pathan	No	monthly	yes	No	No	28.5
Male	31	AA	Sindhi	Yes	monthly	No	No	No	26.7
Male	29	AA	Pathan	Yes	weekly	No	No	HTN	24.1
Male	28	AG	Pathan	No	weekly	No	No	HT, DM	27.4
Male	25	AA	Punjabi	No	weekly	No	No	No	24.9
Female	30	AA	Punjabi	No	monthly	No	No	HTN,Cardiac	28.5
Male	28	AA	Punjabi	No	weekly	yes	No	No	29.9
Male	36	AA	Punjabi	Yes	monthly	yes	No	Cardiac.DM	27.5
Female	22	AA	Pathan	No	monthly	No	No	DM, HTN	26.6
Female	21	AA	Punjabi	No	weekly	yes	No	HTN,Cancer,DM	29.2
Male	35	AG	Urdu Speaking	No	weekly	No	Thyroid, kidney pain	thyroid,DM,HTN	19.4
Female	22	AA	Punjabi	No	weekly	No	No	HTN	14.8
Female	24	AA	Punjabi	No	weekly	No	No	Cardiac	22.7
Male	31	AA	Pathan	No	weekly	No	No	No	24.1
Male	19	AA	Pathan	Yes	weekly	No	No	No	22.6
Female	24	AA	Urdu Speaking	Yes	weekly	No	No	No	22.2
Male	22	AG	Pathan	No	weekly	No	No	No	22.1
Male	47	AG	Punjabi	No	weekly	No	No	No	21.8
Female	20	AA	Urdu Speaking	No	weekly	No	No	No	17.9
Female	19	AA	Urdu Speaking	No	monthly	No	Frontal cyNosis	DM	21.1
Male	45	AA	Kashmiri	No	monthly	No	No	No	22
Male	23	AA	Kashmiri	No	monthly	No	No	No	17.8
Male	26	AA	Seraiki	No	monthly	yes	No	No	22.4
Female	21	AA	Punjabi	Yes	weekly	yes	No	No	25.4
Female	29	AG	Pathan	No	monthly	yes	No	HTN,CVS	18.7
Male	-	AA	Pathan	No	Red meat weekly	No	-	No	21.7
Male	23	AG	Pathan	No	Red meat weekly	Yes	No	Hypertension	26.5
Male	19	AA	Gilgiti	No	Red meat weekly	No	No	No	21.4
Male	24	AA	Gilgiti	Yes	Red meat weekly	No	No	No	22.3
Male	20	AA	Punjabi	-	No	No	No	No	No
F	30	AA	Punjabi	No	monthly	No	No	HTN, CVS	Normal wt
M	35	AG	Punjabi	No	monthly	No	No	HTN, CVS	Normal wt
F	50	AA	Pathan	No	weekly	No	No	No	obesity
F	32	AA	Pathan	No	weekly	No	No	No	Normal wt
M	33	AA	Punjabi	No	monthly	No	No	No	Normal wt
M	47	AG	Punjabi	No	weekly	No	diabetes, BP	No	Normal wt
M	34	AA	Seraiki	No	monthly	No	No	No	Normal wt
M	27	AA	Punjabi	No	monthly	No	No	No	Normal wt
M	37	AG	Punjabi	No	monthly	No	No	No	Normal wt
M	48	AA	Punjabi	yes	weekly	No	No	No	Normal wt
M	31	AG	Punjabi	No	weekly	No	No	No	Normal wt
M	40	AA	Seraiki	No	weekly	No	No	No	Normal wt
M	57	AG	Punjabi	No	weekly	No	No	No	Normal wt
M	46	AA	Punjabi	yes	weekly	No	No	No	Normal wt
M	37	AA	Punjabi	No	weekly	No	No	No	Normal wt
M	40	AA	Punjabi	No	weekly	No	No	No	Normal wt
M	34	GG	Punjabi	yes	weekly	No	No	No	Normal wt
M	53	AA	Punjabi	No	weekly	No	No	No	Normal wt
M	32	AA	Punjabi	No	weekly	No	No	No	Normal wt
F	25	AG	Kashmiri	No	weekly	No	No	T2DM	Normal wt
F	20	AG	Punjabi	No	weekly	No	No	DM	Normal wt
F	20	AA	Punjabi	No	weekly	No	No	No	Normal wt
M	23	AA	Pathan	No	weekly	No	No	No	Normal wt
M	22	AA	Kashmiri	yes	weekly	No	No	No	Normal wt
F	21	AG	Balti	No	weekly	No	No	No	Normal wt
female	21	AA	Seraiki	No	monthly	No	No	No	18.5
female	50	AG	Urdu Speaking	No	weekly	No	Osteoarthritis	hypertention	30.1
male	17	AA	Urdu Speaking	No	monthly	No	No	hypertention	18.6
male	22	GG	Urdu Speaking	No	Daily	No	No	hypertention	18.9
male	53	AG	Pathan	No	weekly	No	No	diabetes	27.3
male	10	AA	Pathan	No	weekly	No	No	No	16.8
female	35	AA	Pathan	No	weekly	No	No	diabetes	30.2
male	60	AA	Urdu Speaking	No	weekly	yes	diabetes	diabetes	26.4
male	20	AA	Urdu Speaking	No	weekly	yes	No	No	25.5
male	31	AA	Urdu Speaking	No	weekly	yes	No	No	26.7
female	20	AA	Urdu Speaking	No	weekly	yes	hypersensitivity type 1	hypertention,diabetes	22.8
female	22	AA	Balti	No	weekly	yes	No	No	16.8
female	53	AA	Balti	No	weekly	yes	No	No	26.4
male	25	AA	Balti	No	weekly	yes	No	No	18.9
male	21	AA	Pathan	No	weekly	No	No	No	19.9
female	65	AA	Urdu Speaking	No	weekly	yes	hypertention	diabetes	34.9
female	53	AA	Urdu Speaking	No	weekly	yes	joint pain	No	23.9
Female	22	AA	Balochi	No	monthly	yes	No	Diabetes	20.9
Female	21	AA	Balochi	No	weekly	yes	Asthma	Diabetes	23.4
Female	39	AG	Punjabi	No	weekly	yes	anxiety, cervical, migraine, sinusitis, vit D defficiency	Diabetes, Arthritis	25.1
Female	13	AA	Punjabi	No	weekly	yes	No		17.4
Male	33	AA	Kashmiri	No	monthly	yes	Epilepsy	No	20
Female	28	AA	Punjabi	No	monthly	yes	pollen allergy	Diabetes, hypertension, heart disease, cardiac hypertrophy	23.7
Female	80	AA	Punjabi	No	weekly	yes	skin allergy, disc dislocation, arthritis	Diabetes, hypertension	26.4
Female	30	AG	Kashmiri	No	Yearly	No	No	No	19.5
Male	40	AA	Kashmiri	Yes	Yearly	No	Diabetes, hypertension	Diabetes, arthrirtis, hypertension	36.7
Male	32	AA	Kashmiri	Yes	monthly	yes	No	Diabetes, hypertension, arthritis	24.1
Female	46	AA	Kashmiri	No	monthly	No	No	arthritis	22.1
Female	35	AA	Kashmiri	No	monthly	yes	hypertension	arthritis	26.3
Male	23	AA	Kashmiri	Yes	weekly	yes	No	No	34.6
Male	33	AA	Kashmiri	No	monthly	yes	No	No	26.4
Female	50	AA	Kashmiri	No	monthly	yes	hypocalcemia, vitamin D defficiency	Diabetes, hypertension, paralysis	27.3
Female	45	AA	Kashmiri	No	monthly	No	hypotension	No	21.4
Female	44	AA	Kashmiri	No	Yearly	No	No	No	23.4
Male	29	AA	Kashmiri	No	Yearly	No	No	Diabetes, hypertension, paralysis, arhtritis	21.5
Female	25	AA	Kashmiri	No	monthly	No	No	hypertension	18.8
Female	36	AA	Kashmiri	No	monthly	No	kidney disease	hypertension, heart disease	25
		AG			monthly
Female	21	AA	Urdu Speaking	No	monthly	Yearly	Yes	16	26.24
Female	56	AA	Urdu Speaking	No	monthly	Yearly	No	45	22.58
Male	30	AA	Urdu Speaking	No	monthly	Monthly	Yes	N/A	26.32
Female	20	GG	Punjabi	No	monthly	Monthly	Yes	N/A	24.19
Male	23	AA	Urdu Speaking	No	monthly	Weekly	Yes	17	20.7
Female	24	AA	Punjabi	No	monthly	Weekly	Yes	N/A	23.11
Female	25	AG	Urdu Speaking	No	monthly	Weekly	Yes	N/A	20.97
Male	28	GG	Punjabi	No	monthly	Weekly	Yes	N/A	21.49
Male	31	AG	Punjabi	No	monthly	Yearly	Yes	N/A	22
Male	27	GG	Kashmiri	No	monthly	Never	Yes	25	21.73
Male	18	AA	Punjabi	No	monthly	Daily	Yes	N/A	24.6
Female	25	GG	Punjabi	No	monthly	Monthly	Yes	20	25.4
Female	25	GG	Urdu Speaking	No	monthly	Monthly	Yes	20	23.48
Female	23	GG	Punjabi	No	monthly	Monthly	No	13	21.35
Female	24	AA	Punjabi	No	monthly	Weekly	No	No	20.4
Female	25	AA	Punjabi	No	monthly	Weekly	Yes	18	25.9
Male	40	AG	Punjabi	No	monthly	Monthly	Yes	No	26.21
Male	17	AA	Punjabi	Yes	monthly	Weekly	Yes	No	19.44
Female	65	AA	Punjabi	Yes	monthly	Weekly	Yes	40	25.68
Female	53	AG	Punjabi	No	monthly	Yearly	Yes	40	23.08
Male	27	AA	Urdu Speaking	No	monthly	Yearly	Yes	No	28.25
male	24	AG	Pathan	Yes	weekly	No	No	No	23.1
male	20	AA	Seraiki	No	weekly	No	No	No	23.4
male	37	AA	Pathan	No	weekly	No	No	No	17.5
female	22	AG	chitrali	No	monthly	No	micro adeNoma	No	26.5
female	40	AA	Pathan	No	monthly	No	No	diabetes	28.5
male	36	AG	Pathan	Yes	weekly	No	mild ulcer	hypertension, diabetes	27.5
F	22	AA	Punjabi	No	yearly	Yes	No	No	27.23
M	35	AA	Punjabi	Yes	monthly	Yes	No	No	25
M	41	AA	Punjabi	No	weekly	No	hyperthyroidism	No	28.7
M	63	AA	Punjabi	No	monthly	No	No	No	21.2
F	59	AA	Punjabi	No	yearly	Yes	No	No	31.37
F	50	AA	Seraiki	No		Yes	diabetes	high B.P	30.57
M	32	AA	Punjabi	No	daily	No	No	No	25.29
M	20	AA	Pathan	No	weekly	No	No	No	18.38
M	58	AA	Urdu Speaking	No		Yes	No	No	26.47		17.6 : Underweight
M	49	AA	Balochi	Yes	weekly	Yes	No	No	22.87		19.0 : Normal Weight
M	42	AA	Punjabi	No	monthly	No	No	No	23.89		18.7 : Normal Weight
M	34	AA	Balochi	No	weekly	No	No	No	24.74
M	21	AA	Seraiki	No	monthly	Yes	No	No	29.41
M	30	AA	Sindhi	No	weekly	Yes	No	No	26.71
M	22	AA	Kashmiri	No	monthly	No	No	No	21.01
M	35	AA	Seraiki	No	weekly	Yes	No	No	23.56
Female	40	AA	Pathan	No	Weekly	Yes	Diabetes	No	30
Female	35	AG	Pathan	No	Weekly	Yes	No	No	25
Female	35	AA	Pathan	No	Weekly	No	Diabetes	No	25
Female	22	AA	Punjabi	No	Weekly	Yes	No	No	18.5
Male	66	AA	Urdu Speaking	No	Weekly	No	AGlucoma Diabetes	No	18.5
Male	38	AA	Pathan	No	Weekly	No	No	No	18.5
Female	31	AG	Pathan	No	Weekly	Yes	No	No	25
Female	42	AA	Punjabi	No	Weekly	yes	Ear Problems	No	25
Male	19	AA	Sindhi	No	Weekly	No	No	No	18.5
Male	26	AA	Seraiki	No	Weekly	No	No	No	18.5
Male	33	AG	Urdu Speaking	No	Weekly	No	Floaters in eyes	No	25
Female	26	AA	Punjabi	No	Weekly	No	Acne vulAGris	No	25
Male	24	AA	Kashmiri	No	Weekly	No	No	No	24.2
Female	45	AA	Kashmiri	No	Weekly	No	Rheumatic pain	No	22.3
Female	39	AA	Punjabi	No	Weekly	No	cerebral disslocation	No	29
Female	45	AG	Punjabi	No	Weekly	No	No	No	25.7
Female	13	AA	Pathan	No	Weekly	Yes	No	No	15.4
Female	13	AA	Pathan	Yes	Weekly	Yes	Tuberculosis	No	14.1
Female	30	AA	Pathan	No	Weekly	No	Typhoid Fever	No	22.6
Female	19	AA	Pathan	No	Weekly	No	No	No	15.4
Female	24	AA	Urdu Speaking	No	Weekly	No	Sore throat	No	18.9
F	24	AA	gilgiti	No	Yearly	No	No	No	18
M	21	GG	chitrali	No	Yearly	No	No	No	22
M	17	AA	gilgiti	No	Weekly	No	No	No	13.1
M	17	AA	gilgiti	No	Weekly	No	No	No	17
F	53	AA	gilgiti	No	Weekly	No	hypertension, diabetes	positive	29.4
F	19	AA	Pathan	No	Yearly	No	No	No	21.4
F	23	AG	Pathan	No	Yearly	No	No	No	18.4
F	18	AA	Pathan	No	Yearly	No	No	No	17.5
M	20	AA	Sindhi	No	Weekly		nil	nil
M	43	AA	Balochi	No	Weekly	No	high BP	yes	26
M	50	AA	balti	No	Yearly		high BP	No	33.3
M	14	AA	Sindhi	No	Yearly		nil	nil	34.3
M	21	AA	Balochi	Yes	Monthly		migraine	nil	28.2
M	31	AA	Balochi	No	Weekly		diabetes	nil
M	40	AA	Punjabi	yes	Yearly	yes	No	No	24.4
M	23	AA	Punjabi	No	No	yes	No	No	20
Male	65	GG	Punjabi	Yes	Daily	No	Diabetes	No	16
Male	52	GG	Punjabi	Yes	monthly	No	Diabetes	Diabetes	8.3
Female	49	AA	Punjabi	No	monthly	No	No	No	8.9
Male	31	AA	Punjabi	Yes	monthly	No	No	No	11.6
Female	20	GG	Punjabi	No	monthly	No	No	No	9.4
Male	27	AA	Punjabi	Yes	monthly	YES	No	No	14.6
Male	23	AA	Punjabi	No	daily	No	No	No	10.8
Female	66	AG	Punjabi	No	monthly	No	Diabetes	Diabetes	10.8
Female	32	AG	Punjabi	No	weekly	No	Asthma	Asthma	10.1
Female	30	AA	Punjabi	No	monthly	No	kidney pain	No	10.5
Male	21	AA	Punjabi	No	weekly	No	No	No	12.8
Male	59	AA	Punjabi	No	Daily	No	No	No	11.3
Male	33	AG	Punjabi	Yes	monthly	yes	Epylapsy	No	10.5
Male	62	AA	Punjabi	No	weekly	YES	Diabetes	No	7.7
Male	48	AA	Punjabi	No	weekly	No	No	No	10
Male	70	AG	Punjabi	No	weekly	YES	Diabetes, hypertension,depression,cardiac disease	No	9.4
Male	52	GG	Punjabi	No	weekly	No	Depression,	depression	12.5
Female	45	AA	Punjabi	No	weekly	No	Diabetes,Depression	Diabetes, ,hypertension,cardiac disease	9.7
Female	50	AA	Punjabi	No	weekly	No	Hypertension,Diabetes,cardiacdisease	Diabetes,hypertension,cardiac disease	12.6
Female	62	AA	Punjabi	No	weekly	YES	Depression,hypertension,Diabetes,cardiac disease	Diabetes,hypertension,cardiac disease	10.6
Male	45	AA	Punjabi	No	weekly	No	Diabetes,cardiac disease,hyportension	Diabetes,Hyportension.cardiac disease	10.5
Female	40	AA	Punjabi	No	weekly	No	No	No	16.5
Female	35	AA	Punjabi	No	weekly	No	No	No	11.9
Female	34	AG	Punjabi	No	weekly	No	No	No	11.9
Female	75	GG	Punjabi	No	monthly	YES	No	No	16.3
Female	45	AA	Punjabi	No	NO	No	Hepatits C	No	7.3
Female	50	AA	Punjabi	No	Daily	No	Allergy	No	9.7
Female	50	AA	Punjabi	No	Daily	No	constipation	No	15
Female	80	AG	Punjabi	No	weekly	No	No	No	22
Male	21	AA	Punjabi	No	Daily	Yes	No	No	8.9
Male	22	AA	Punjabi	Yes	weekly	No	No	No	12.2
Male	23	AA	Punjabi	No	weekly	No	No	No	10.3
Male	50	AA	Punjabi	No	Daily	No	No	No	13.7
Female	40	AA	Punjabi	No	monthly	No	No	No	8.9
M	20	GG	Urdu Speaking	No	monthly	Weekly	Yes	No	No
F	18	AA	Punjabi	No	monthly	Weekly	Yes	No	No
M	19	AA	Punjabi	No	monthly	Daily	No	No	No
F	19	AA	Pathan	No	monthly	Weekly	No	No	No
M	18	AA	Urdu Speaking	No	monthly	Weekly	No	No	No
F	19	AA	Urdu Speaking	No	monthly	Weekly	No	No	No
F	19	AA	Punjabi	No	monthly	Monthly	No	No	No
M	19	AA	Punjabi	No	monthly	Weekly	No	No	No
Male	53	AG	Punjabi	No	weekly	No	No	CVS disease	31.1
Male	60	AG	Punjabi	No	weekly	No	No	No	23.4
Male	34	AA	Chitrali	No	monthly	No	No	No	26.6
Female	22	AA	Punjabi	No	weekly	No	No	No	24.4
Female	17	AA	Punjabi	No	No	yes	No	No	24.5
Female	52	AA	Punjabi	No	weekly	No	No	Liver dieseases	24.8
Female	21	AA	Punjabi	No	monthly	No	No	No	20.8
Male	23	AA	Pathan	No	weekly	No	No	No	overweight
Male	24	AA	Pathan	No	weekly	No	No	No	Normal
male	21	AA	Pathan	No	weekly	No	No	No	Normal
male	24	AG	Pathan	Yes	Daily	No	No	No	Normal
male	23	AA	Pathan	Yes	weekly	No	No	No	Normal
Male	23	AG	Pathan	No	No	No	No	No	overweight
male	23	AA	Pathan	Yes	Daily	No	No	No	Normal
male	23	AA	Pathan	No	Daily	No	No	No	18.5
Male	25	AA	Pathan	No	weekly	No	No	No	23.1
male	21	AA	Pathan	No	Daily	No	No	No	Normal
Male	19	AA	Pathan	No	Daily	No	No	No	Normal
Male	22	AG	Pathan	No	Daily	No	No	No	Normal
male	21	AA	Pathan	No	weekly	No	No	No	overweight
male	22	AA	Pathan	Yes	weekly	No	No	No	Normal
Male	24	AA	Pathan	No	Daily	No	No	No	overweight
Male	22	AA	Pathan	No	Daily	Yes	No	No	Normal
Male	22	AA	Pathan	No	weekly	No	No	No	Normal
Male	23	AA	Pathan	Yes	Daily	No	No	No	overweight
Male	23	AA	Pathan	Yes	No	No	No	No	Underweight
Male	20	AA	Urdu Speaking	Yes	Monthly	yes	No	No	16.5
Male	16	AA	Urdu Speaking	No	Monthly	yes	No	HTN	18
Male	20	AA	Urdu Speaking	Yes	weekly	No	No	No	18.5
Male	22	AA	Urdu Speaking	No	Monthly	No	No	No	20
Male	25	AA	Punjabi	No	Monthly	yes	No	No	20
Male	26	AG	Punjabi	No	Monthly	Yes	No	No	18.5
Male	19	AA	Sindhi	No	Monthly	YEs	No	No	22
Male	24	AA	Seraiki	Yes	Monthly	yes	No	No	19
		AA			Monthly
Male	22	AG	Pathan	No	Monthly	No	No	No	Normal
		AA			Monthly
Female	24	AA	Punjabi	No	Weekly	yes	Acne form eruptions	No	28.1
Male	23	AA	Pathan	No	Yearly	yes	No	No	24.1
F	27	AA	Punjabi	No	Monthly	yes	No	No	No
M	31	AA	Punjabi	yes	Monthly	No	No	diabetes	No
M	24	AA	Punjabi	yes	Monthly	yes	No	Kindney	No
M	21	AA	Punjabi	No	Monthly	No	No	No	No
M	29	AA	Pathan	Yes	Monthly	No	No	No	19
M	52	AG	Seraiki	No	Monthly		No	diabetes	23.4
M	30	AA	Punjabi	No	Monthly	No	No	No	21.9
F	42	AA	Urdu Speaking	No	Monthly	No	asthma	No	80 kg
M	65	AA	Punjabi	No	Monthly	No	On chemotherapy	No	28.2
M	15	AA	Punjabi	No	Monthly	No	No	No	22
M	27	AA	Punjabi	Yes	Monthly	No	No	No	24.2
F	33	AA	Punjabi	No	Monthly	Yes	No	No	22.7
F	57	AG	Punjabi	No	Monthly	yes	Diabetes	brother	31.2
F	12	AA	Punjabi	No	Monthly	No	No	No	18.9
M	56	AA	Punjabi	Yes	Monthly	yes	No	No	37
M	74	AA	Punjabi	No	No	yes	No	No	16.5
M	35	AA	Punjabi	Yes	Weekly	No	No	No	26.7
M	31	AA	Punjabi	No	Weekly	No	No	diabetes	27.3
F	62	AA	Kashmiri	No	Monthly	No	No	No	No
M	27	AA	Punjabi	No	Monthly	No	No	No	18.9
m	20	AA	Punjabi	Yes	Monthly	No	No	diabetes	17.8
M	13	AA	Punjabi	No	Monthly	No	No	diabetes	14.6
F	48	AA	Punjabi	No	Weekly	yes	Diabetes	mother	29.2
m	9	AA	Punjabi	No	Weekly	No	No	diabetes	18
F	23	AA	Punjabi	No	Weekly	No	No	No	No
M	23	AA	Punjabi	No	Weekly	No	No	No	20.5
M	48	AG	Pathan	No	Weekly	No	No	No	26.9
M	40	AA	Punjabi	No	Weekly	No	No	No	No
F	22	AA	Punjabi	No	Weekly	yes	No	No	26.2
M	40	AA	Punjabi	Yes	Weekly	No	No	No	25.6
F	48	AA	Punjabi	No	Weekly	yes	Diabetes	yes	30.2
f	27	AA	Punjabi	No	Weekly	ye	No	No	27.7
m	25	AA	Seraiki	No	Weekly	No	No	No	24.9
F	50	AA	Punjabi	No	Weekly	Yes	hypertension	mother	28.7
M	26	AA	Punjabi	No	Monthly	No	No	No	23
F	45	AA	Punjabi	No	Monthly	yes	No	No	28.1
M	18	AA	Punjabi	No	Monthly	No	No	No	19.6
m	18	AA	Kashmiri	No	Monthly	No	No	No	20.6
F	50	AG	Punjabi	No	Monthly	Yes	Diabetes	No	30.2
M	28	AA	Pathan	Yes	Monthly	No	No	No	22.3
M	29	AA	Punjabi	No	Daily	No	No	No	20.1
M	56	AA	Punjabi	No	Daily	No	arthritis	No	27.6
M	32	AA	Kashmiri	Yes	Monthly	No	asthma	No	22.3
f	3	AA	Punjabi	No	Weekly	No	kidney problem	No	23
Female	33	AA	Sindhi	No	Weekly	No	No	No	8.3
Male	28	AA	Balochi	Yes	Weekly	No	No	No	9.2
Male	18	AA	Balochi	Tea	Weekly	No	Acidity	No	11.9
Male	52	AA	Balochi	No	Weekly	No	hypertension	Yes	11.7
Male	23	AA	Balochi	No	Monthly	No	No	No	10.8
Male	13	AA	Balochi	No	Weekly	No	No	No	11.9
male	20	AA	Punjabi	Yes	Weekly	yes	No	No	25-29.99
male	24	AA	Punjabi	No	Weekly	yes	No	No	18.5-24.99
male	21	AA	Punjabi	Yes	Weekly	No	No	No	18.5-24.99
male	20	AA	Pathan	No	Weekly	No	No	No	18.5 or less
male	21	GG	Gilgiti	Yes	Weekly	No	No	No	18.5-24.99
male	20	AA	Gilgiti	Yes	Weekly	yes	No	No	18.5 or less
male	26	AA	Punjabi	Yes	Weekly	yes	No	No	25-29.99
male	27	AA	Punjabi	Yes	Weekly	No	No	No	18.5-24.99
male	26	AA	Punjabi	Yes	Weekly	yes	No	No	25-29.99
male	23	AA	Punjabi	Yes	Weekly	No	No	No	18.5-24.99
male	25	AA	Punjabi	No	Weekly	No	No	No	18.5-24.99
male	26	AG	Punjabi	Yes	Weekly	yes	No	No	18.5-24.99
male	20	AG	Punjabi	Yes	Weekly	yes	No	No	18.5-24.99
male	22	AA	Punjabi	Yes	Weekly	yes	No	No	18.5-24.99
male	20	AA	Sindhi	No	Weekly	yes	No	No	18.5-24.99
male	22	AA	Pathan	Yes	Weekly	yes	No	No	18.5-24.99
male	21	AG	Pathan	Yes	Weekly	yes	No	No	18.5-24.99
male	21	AA	Pathan	No	Weekly	yes	No	No	18.5-24.99
male	24	AA	Sindhi	Yes	Weekly	yes	No	No	18.5-24.99
male	22	AA	Pathan	No	Weekly	yes	No	No	18.5-24.99
male	20	AA	Pathan	Yes	Weekly	yes	No	No	18.5-24.99
male	21	AA	Pathan	No	Weekly	yes	No	No	18.5-24.99
male	23	AA	Pathan	No	Weekly	No	No	No	18.5-24.99
male	24	AA	Punjabi	Yes	Weekly	yes	No	No	18.5-24.99
male	22	AA	Punjabi	No	Weekly	yes	No	No	18.5-24.99
male	25	AA	Punjabi	Yes	Weekly	yes	No	No	18.5-24.99
M	24	AA	Pathan	No	weekly	No	No	No	28.05
M	64	AA	Seraiki	No		No	UriNory urgency	No	27.11
F	30	AA	Punjabi	No	weekly	No	No	No	25.31
M	28	AA	Punjabi	No	monthly	No	No	No	22.05
M	18	AG	Pathan	Yes	weekly	yes	No	No	20.33
M	21	AA	Pathan	No	daily	No	No	No	23.38
M	24	AA	Pathan	Yes	monthly	No	No	No	22.79
M	24	AA	Pathan	No	weekly	yes	No	No	26.47
M	55	AA	Pathan	No	weekly	Yes	reNol disease	No	21.81
M	14	AA	Pathan	No	daily	No	No	No	19.06
F	55	AA	Pathan	No	weekly	yes	No	No	29.41
F	27	AA	Pathan	No	weekly	No	No	No	26.82
M	20	AA	Pathan	No	weekly	No	No	No	21.37
M	30	AA	Urdu Speaking	No	monthly	yes	No	No	30.5
M	20	AA	Balochi	No	weekly	Yes	No	No	20.76
Male	21	AG	Pathan	Yes	Monthly	No	Not any disease	Cardiac diseases	21.8
Male	21	AA	Pathan	No	weekly	No	Not any disease	Hypertension	18.5
Female	13	AA	Gilgiti	No	Yearly	No	Not any disease	Not any family history	19.1
Male	22	AA	Gilgiti	No	Yearly	Yes	Not any disease	Not any family history	17.36
Male	24	AA	Gilgiti	No	Monthly	No	Not any disease	Not any family history	19.57
Female	24	AA	Kashmiri	No	Monthly	No	Not any disease	Hypertension	20.81
Female	23	AA	Kashmiri	No	weekly	yes	Not any disease	Diabetes and cardiac diseases	15.14
Male	23	AA	Pathan	No	Monthly	No	Not any disease	Not any family history	19.92
Male	21	AA	Punjabi	No	Monthly	No	Not any disease	Not any family history	21.34
Male	19	AA	Punjabi	No	Monthly	No	Not any disease	Not any family history	20.53
Male	18	AA	Punjabi	No	Monthly	No	Not any disease	Not any family history	20.17
Male	28	AA	Punjabi	No	Monthly	No	Not any disease	Not any family history	22.96
Male	18	AA	Pathan	Yes	Yearly	yes	Not any disease	Not any family history	19.37
Male	26	AG	Punjabi	No	weekly	yes	Not any disease	Not any family history	20.1
Male	19	AA	Urdu Speaking	Yes	monthly	No	No	No	9.2
Male	24	AA	Punjabi	No	monthly	No	No	Hypertension	10.6
Male	20	AA	Punjabi	No	Monthly	No	No	BP	7.2
Male	26	AA	Balochi	Yes	weekly	No	No	Hypertension	10.8
Male	18	AA	Pathan	No	No	No	No	No	8.4
Male	18	AA	Pathan	No	weekly	No	No	No	8.9
Female	17	AG	Pathan	No	monthly	YES	No	No	14.6
Male	40	AA	Pathan	tobacoo chewing	monthly	YES	No	No	7.5
Male	21	AA	Punjabi	No	monthly	No	No	No	9.4
Male	18	AA	Pathan	No	monthly	No	No	No	11.6
Male	19	AA	Pathan	Yes	weekly	No	No	No	12
Male	17	AG	Pathan	No		YES	No	No	8.6
Male		AA	Pathan	No		YES	No	No	18.5
		AA	Balochi
		AA	Balochi
		AA	Balochi
		AA	Balochi
		AA	Balochi
		AA	Balochi
		AA	Balochi
		AA	Balochi
		AA	Balochi
		AA	Balochi
		AA	Balochi
		AA	Balochi
		AA	Balochi
		AA	Balochi
		AA	Balochi
		AA	Balochi
		AA	Balochi
		AA	Balochi
		AA	Balochi
		AA	Balochi
		AA	Balochi
		AA	Pathan
		AA	Pathan
		AA	Pathan
		AA	Pathan
M	21	AA	Saraiki	No	Weekly	Yes	No	NA
F	23	AA	Saraiki	No	Yearly	No	No	Diabetes Mellitus
F	20	AA	Saraiki	No	Weekly	Yes	No	NA
F	22	AA	Saraiki	No	Weekly	Yes	Polen and dust allergy	Yes
F	22	AA	Saraiki	No	Weekly	No	No	NA
F	22	AA	Saraiki	No	NA	No	No	NA
F	22	AG	Saraiki	No	NA	No	No	NA
F	22	AG	Saraiki	No	Yearly	No	No	NA
F	21	AA	Saraiki	No	Yearly	No	No	NA
F	22	AA	Saraiki	No	NA	No	No	NA
M	21	AA	Saraiki	No	Weekly	No	No	NA
M	24	AG	Saraiki	No	NA	NA	No	NA	24
M	22	AA	Saraiki	No	Weekly	No	No	NA	23
M	21	AA	Saraiki	No	Weekly	No	No	NA
M	22	AA	Saraiki	No	Monthly	No	No	NA
M	20	AA	Saraiki	No	Weekly	Yes	No	NA
M	24	AA	Saraiki	No	Weekly	NA	No	NA
M	21	AA	Saraiki	No	Weekly	Yes	No	NA
F	23	AA	Saraiki	No	Weekly	NA	No	NA
F	22	AA	Saraiki	No	Weekly	NA	No	NA
M	24	AA	Saraiki	No	Monthly	No	No	NA	18.92
M	24	AA	Saraiki	No	NA	NA	No	NA
M	23	AA	Saraiki	No	NA	NA	No	NA
M	21	AA	Saraiki	No	Daily	Yes	Epilepsy	No
M	22	AA	Saraiki	No	Daily	Yes	No	NA
M	22	AA	Saraiki	No	Weekly	No	No	NA	25.5
M	23	AG	Saraiki	No	Weekly	Yes	No	NA
M	23	AA	Saraiki	No	NA	No	No	NA	19
M	23	AA	Saraiki	No	Weekly	NA	No	Hypertension
F	23	AG	Saraiki	No	NA	No	No	NA
F	22	AA	Saraiki	No	Weekly	No	No	NA
F	21	AG	Saraiki	No	Weekly	No	No	NA
F	22	AA	Saraiki	No	Weekly	Yes	No	NA
F	22	AA	Saraiki	No	Weekly	NA	No	NA
F	22	AA	Saraiki	No	Weekly	NA	No	NA
F	21	AG	Saraiki	No	Weekly	Yes	No	NA
F	19	AA	Saraiki	No	NA	No	No	NA
F	18	AA	Saraiki	No	NA	Yes	No	NA
M	21	AG	Saraiki	No	NA	NA	No	NA
M	21	AA	Saraiki	No	Weekly	No	No	NA
M	22	AA	Saraiki	No	Weekly	No	No	NA
M	20	AA	Saraiki	No	Weekly	No	No	NA
M	20	AA	Saraiki	No	NA	No	No	NA
M	19	AA	Saraiki	No	Weekly	No	No	NA
M	23	AA	Saraiki	No	NA	No	No	NA
M	21	AA	Saraiki	No	Monthly	No	No	NA
M	21	AA	Saraiki	No	Weekly	No	No	NA
M	21	AA	Saraiki	No	Weekly	Yes	No	NA
M	19.5	AA	Saraiki	No	Weekly	No	No	NA
M	20	AA	Saraiki	No	Weekly	Yes	No	NA
M	32	AA	Urdu Speaking	3447880
M	28	AA	Urdu Speaking	3439151
M	21	AA	Urdu Speaking	3445470
M	19	GG	Urdu Speaking	2040200
M	40	AG	Urdu Speaking	418170
M	22	GG	Urdu Speaking	3449319
M	34	AA	Urdu Speaking	410576
M	18	AA	Urdu Speaking	3448866
M	24	AA	Urdu Speaking	3448601
M	21	AA	Urdu Speaking	1229324
M	20	AA	Urdu Speaking	3448206
M	24	AA	Urdu Speaking	3448266
M	33	AG	Urdu Speaking	3448546
M	23	AA	Urdu Speaking	129476
M	28	AA	Urdu Speaking	3462370
M	33	AA	Urdu Speaking	3452277
M	23	AA	Urdu Speaking	3452399
M	22	AA	Urdu Speaking	3463079
M	38	GG	Urdu Speaking	3463329
M	31	AA	Urdu Speaking	3452240
F	27	AA	Urdu Speaking	2095452
M	23	AA	Urdu Speaking	3452251
M	31	AG	Urdu Speaking	3456643
M	23	AA	Urdu Speaking	3450797
M	22	AA	Urdu Speaking	3457043
M		AA	Urdu Speaking
M	34	AA	Urdu Speaking	3447187
M	20	AA	Urdu Speaking	2899140
M	22	AA	Urdu Speaking	3446606
M	37	AA	Urdu Speaking	3447427
M	24	GG	Urdu Speaking	3453225
M	36	AA	Urdu Speaking	3453045
M	27	AA	Urdu Speaking	3452587
M	35	AA	Urdu Speaking	2359900
M		AA	Urdu Speaking
M	29	AA	Urdu Speaking	3456938
M	25	AA	Urdu Speaking	3447779
M	37	AA	Urdu Speaking	2473958
M	44	AA	Urdu Speaking	3448487
M	19	AG	Urdu Speaking	3448386
M	42	AA	Urdu Speaking	2373387
M	20	AA	Urdu Speaking	3143759
M	34	AG	Urdu Speaking	3452038
M	26	AA	Urdu Speaking	1841283
F	25	AA	Sindhi
M	35	AA	Sindhi	3456846
M	30	AA	Sindhi	3457000
M	24	AA	Sindhi	3448636
M	44	AA	Sindhi	3449028
M	41	AA	Sindhi	2601286
	34	AA	Sindhi	1665426
M	21	AA	Sindhi	2613639
M	22	AA	Sindhi	3453333
M	46	AA	Sindhi	487044
M	34	AA	Sindhi	3448677
	28	AA	Sindhi	2777836
M	29	AA	Sindhi	3344766
M	41	AA	Sindhi	3448971
M	36	AA	Sindhi	3449019
M	27	AA	Sindhi	3457048
M	38	GG	Sindhi	3450688
M	42	AA	Sindhi	3451814
M	25	AG	Sindhi	3449139
M	36	AA	Sindhi	3448809
M	38	AA	Sindhi
M	24	AG	Sindhi	3452036
M	22	AA	Sindhi	3453078
M	26	AA	Sindhi	3452632
M	32	AA	Sindhi	3449143
M	43	AA	Sindhi	3448681
M	42	AA	Sindhi
M	20	AG	Sindhi	3452877
M	33	AA	Sindhi	3452389
M	45	AA	Sindhi	1516643
M	35	AA	Sindhi
M	31	AA	Sindhi	3429255
M	26	AG	Sindhi	3462980
M	24	AA	Sindhi	3376382
M	30	AA	Sindhi	3447948
M	32	AA	Sindhi	3442008
M	28	AA	Sindhi
F	33	AA	Sindhi	3456689
M	43	AA	Sindhi	3452246
M	31	AA	Sindhi	3430913
M	37	AG	Sindhi
M	44	AG	Sindhi	3452384
M	47	AA	Sindhi	1727939
M	26	AA	Sindhi	3107346
M	41	AA	Sindhi	3445344
	39	AA	Sindhi
F	29	AA	Sindhi	3452403
M	33	AG	Sindhi	3452472
M	40	AA	Sindhi	3450812
M	27	AA	Sindhi	2238779
M	24	AA	Balochi	Yes	Daily	Yes	NA	NA	23.8
M	21	AA	Balochi	No	NA	No	NA	NA	23.1
M	22	AA	Balochi	No	Daily	No	NA	NA	24.9
M	19	AA	Balochi	No	Daily	No	NA	NA	18.1
M	21	AA	Balochi	No	Weekly	No	NA	NA	17.1
M	24	AA	Balochi	No	NA	Yes	Sinusitis	Paternal	22.8
M	24	AA	Balochi	No	Weekly	No	NA	NA	23.5
M	21	AA	Balochi	No	Weekly	Yes	NA	NA	23.4
M	20	AA	Balochi	Yes	Monthly	Yes	NA	NA	18.7
M	20	AA	Balochi	No	Daily	No	NA	NA	25.2
M	22	AA	Balochi	No	Weekly	Yes	NA	NA	20
M	22	AA	Balochi	No	Monthly	Yes	NA	NA	22.8
M	22	AA	Balochi	Yes	Daily	No	NA	NA	20.2
M	21	AA	Balochi	Yes	Monthly	Yes	NA	NA	21.2
M	21	AA	Balochi	Yes	Weekly	No	NA	NA	23.7
M	26	AA	Balochi	No	Yearly	No	NA	NA	20.9
M	21	AA	Balochi	No	Daily	Yes	NA	NA	31.1
M	23	AA	Balochi	Yes	Weekly	Yes	NA	NA	19.5
M	22	AA	Balochi	No	Daily	Yes	NA	NA	24.1
M	25	AA	Balochi	No	Weekly	No	NA	NA	30.2
M	23	AA	Balochi	No	NA	No	NA	NA	27
M	20	AA	Balochi	Yes	Monthly	Yes	NA	NA	19.6
M	21	AA	Balochi	No	Daily	Yes	NA	NA	26.5
M	23	AA	Balochi	No	Weekly	No	NA	NA	17.9
M	21	AG	Balochi	Yes	Weekly	No	NA	NA	21.2
M	25	AA	Balochi	No	Weekly	No	NA	NA	21.3
F	20	AA	Balochi	No	Weekly	No	NA	NA	21.1
F	19	AA	Balochi	No	Weekly	No	NA	NA	25.8
F	21	AA	Balochi	No	Weekly	Yes	NA	NA	18.9
M	30	AA	Balochi	No	Monthly	Yes	NA	NA	20
F	22	AA	Balochi	No	Monthly	Yes	Hypothyroidism	NA	22.1
F	19	AG	Balochi	No	Daily	No	NA	NA	24.9
F	20	AG	Balochi	No	Weekly	No	NA	NA	17.6
M	10	AG	Balochi	No	Weekly	No	NA	NA	17.6
F	19	AA	Balochi	No	Yearly	Yes	NA	NA	13.3
F	19	AA	Balochi	No	Monthly	Yes	NA	NA	19.3
M	25	AA	Balochi	No	Weekly	Yes	NA	NA	26
F	21	AA	Balochi	No	Monthly	Yes	NA	NA	16.8
F	21	AA	Balochi	No	Weekly	Yes	NA	NA	17.4
M	21	AG	Balochi	Yes	Weekly	No	NA	NA	20.6
M	22	AA	Balochi	No	Weekly	No	NA	NA	19.4
F	25	AA	Balochi	No	Weekly	No	NA	NA	20.8
M	18	AG	Balochi	Yes	Weekly	No	NA	NA	17.6
M	21	AA	Balochi	No	Weekly	Yes	NA	NA	30.4
F	20	AA	Balochi	No	Weekly	No	NA	NA	21.4
M	32	AA	Balochi	No	Weekly	Yes	NA	NA	22
		691

## Sheet: Sheet2
Ethinicity	Count	Original Count
Punjabi	546	537
Pathan	126	134
Kashmiri	69	45
Sindhi	11	8
Seraiki	18	18
Urdu Speaking	49	40
Baloch	9	12
G/B	21	21
Total	849	828

## Sheet: Sheet3
Gender	Age(yrs)	Genotype	Ethnicity	Addiction	Diet(red meat)	Sedentary lifestyle	Cousin Marriages	Disease	Age of Onset	Family History	BMI	Co-morbidities	Medications
male	23		pathan	marijuana	no red meat/ tea 2 cups	N/A	no	NA	NA	NA	20.5	NA	NA
male	23		pathan	N/A	red meat daily/tea 2 cups	no	NA	NA	NA	NA	18.5	NA	NA
male	25		pathan	N/A	red meat weekly	no	NA	NA	NA	NA	23.1	NA	NA
male	21		pathan	Cigarrete smoking	red meat daily/tea 4 cups	no	NA	NA	NA	NA	22.8	NA	NA
male	21		pathan	N/A	red meat weekly/tea 1 cup	no	NA	NA	NA	NA	27.5	NA	NA
